# Supplementary material for: Synthesis and chemical recycling of biobased poly(acetal-ester)s with a non-cyclic acetal unit
Source: Royal Society of Chemistry journal article supplement (doi:10.1039/d4gc05778c), 2025-01-01
Supplement: d4gc05778c2.pdf [file d4gc05778c2.pdf]

Table s2. Three reaction parameters (i.e., base, temperature, solvent) were optimized toward high conversion and low climate impact for the synthesis of Monomer 1. The parameters and the results were color coded to illustrate sustainability, with green being the most sustainable, yellow the intermediately sustainable, and red the least sustainable.

| Reaction | Parameters                     |                                  |                      | Results                        |                                                                      |
|----------|--------------------------------|----------------------------------|----------------------|--------------------------------|----------------------------------------------------------------------|
|          | Base <sup>a</sup>              | Temperature <sup>b</sup><br>(°C) | Solvent <sup>c</sup> | Conversion <sup>d</sup><br>(%) | Climate Impact <sup>e</sup><br>(kg CO <sub>2</sub> eq. / kg monomer) |
| A*       | K <sub>2</sub> CO <sub>3</sub> | 82                               | ACN                  | 88                             | 12.4                                                                 |
| B        | K <sub>2</sub> CO <sub>3</sub> | 56                               | Acetone              | 82                             | 13.9                                                                 |
| C        | K <sub>2</sub> CO <sub>3</sub> | 20                               | DMSO                 | 50                             | 22.3                                                                 |
| D        | K <sub>2</sub> CO <sub>3</sub> | 20                               | Acetone              | 0                              | -                                                                    |
| E        | NaOH                           | 82                               | ACN                  | 95                             | 9.38                                                                 |
| F        | NaOH                           | 82                               | DMSO                 | 85                             | 10.4                                                                 |
| G        | NaOH                           | 82                               | <i>t</i> -BuOH       | 58                             | 15.1                                                                 |
| H        | NaOH                           | 56                               | DMSO                 | 99                             | 8.88                                                                 |
| I        | NaOH                           | 56                               | ACN                  | 34                             | 25.2                                                                 |
| J        | NaOH                           | 56                               | <i>t</i> -BuOH       | 0                              | -                                                                    |
| K        | NaOH                           | 20                               | DMSO                 | 43                             | 19.1                                                                 |
| L        | NaOH                           | 30                               | <i>t</i> -BuOH       | 0                              | -                                                                    |
| M        | NaOH                           | 20                               | Acetone              | 0                              | -                                                                    |

\* The initial non-optimized reaction conditions for synthesis of monomer 1. <sup>a</sup> Color-coded according to the GHG emissions of the production of the two bases. <sup>b</sup> Higher reaction temperatures were generally less favorable due to energy consumption. <sup>c</sup> Color-coded according to the CHEM21 solvent guide. <sup>d</sup> The conversion after 24 h according to <sup>1</sup>H NMR spectroscopy. High conversions (above 80%) were color-coded green, medium to low conversions (34-58%) were yellow, and non-conversion was red. <sup>e</sup> Climate impacts lower than the non-optimized reaction A\* (i.e., < 12.4 kg CO<sub>2</sub> eq./kg) were color-coded green, higher climate impacts (i.e., 12.4-25.2 kg CO<sub>2</sub> eq./kg) were color-coded yellow, and climate impacts which could not be calculated (due to the low conversion) were color-coded red.
